# Supplementary material for: Comparison between single and multi-locus approaches for specimen identification in Mytilus mussels
Source: PubMed Central journal article supplement (PMC6928075; doi:10.1038/s41598-019-55855-8), 2019-12-23
Supplement: 41598_2019_55855_MOESM1_ESM.pdf [file 41598_2019_55855_MOESM1_ESM.pdf]

1

2

3

4

5

6 Comparison between single and multi-locus  
7 approaches for specimen identification in *Mytilus*  
8 mussels

9

10 María Angélica Larraín<sup>1\*</sup>, Pía González<sup>1+</sup>, Claudio Pérez<sup>2+</sup>, Cristián Araneda<sup>1,2</sup>

11

12

13

14 <sup>1</sup> Food Quality Research Center, Departamento de Ciencia de los Alimentos y Tecnología Química,  
15 Facultad de Ciencias Químicas y Farmacéuticas, Universidad de Chile, Santiago, Chile

16

17 <sup>2</sup> Laboratorio de Genética y Biotecnología en Acuicultura, Departamento de Producción Animal, Facultad  
18 de Ciencias Agronómicas, Universidad de Chile, Santiago, Chile

19

20

21

22

23

24 \* Corresponding author: mlarrain@uchile.cl

25 + These authors contributed equally to this work.

26

**S1 - Sample information:** Species according RFLP-PCR Me15-16 *Aci*I, code, number of individuals, location and collection date.

**Species according**

| <b>RFLP-PCR Me15-16 <i>Aci</i>I</b> | <b>Code</b> | <b>N° individuals</b> | <b>Location</b>               | <b>Latitude</b> | <b>Longitude</b> | <b>Date</b> |
|-------------------------------------|-------------|-----------------------|-------------------------------|-----------------|------------------|-------------|
| <i>M. trossulus</i>                 | MT-1        | 50                    | West Vancouver - Canada       | 49.3400         | -123.2329        | 05.30.2017  |
| <i>M. edulis</i>                    | ME-1        | 50                    | Prince Edward Island - Canada | 46.1002         | -63.1447         | 07.14.2011  |
| <i>M. galloprovincialis</i>         | MG-1        | 49                    | Galicia - Spain               | 42.5670         | -8.8472          | 06.20.2008  |
|                                     | MG-2        | 50                    | Dichato - Chile               | -36.5234        | -72.9331         | 06.13.2008  |
| <i>M. chilensis</i>                 | MCh-1       | 50                    | Putemun - Chile               | -42.4316        | -73.7499         | 06.13.2008  |
|                                     | MCh-2       | 49                    | Quillaipe - Chile             | -41.5487        | -72.7707         | 06.24.2009  |

## S2 - 49 SNPs panel assignment performance

| Species according<br>RFLP-PCR <i>Me15-16 Aci I</i> | [%]   | [Number of individuals] |                  |                             |                     | TOTAL |
|----------------------------------------------------|-------|-------------------------|------------------|-----------------------------|---------------------|-------|
|                                                    |       | <i>M. trossulus</i>     | <i>M. edulis</i> | <i>M. galloprovincialis</i> | <i>M. chilensis</i> |       |
| <i>M. trossulus</i>                                | 100.0 | 17                      | 0                | 0                           | 0                   | 17    |
| <i>M. edulis</i>                                   | 100.0 | 0                       | 27               | 0                           | 0                   | 27    |
| <i>M. galloprovincialis</i>                        | 100.0 | 0                       | 0                | 105                         | 0                   | 105   |
| <i>M. chilensis</i>                                | 99.5  | 0                       | 0                | 1                           | 188                 | 189   |
| GLOBAL                                             | 99.7  | 17                      | 27               | 106                         | 188                 | 338   |

Data from

Larraín, M. A., Zbawicka, M., Araneda, C., Gardner, J. P. A. & Wenne, R. Native and invasive taxa on the Pacific coast of South America: Impacts on aquaculture, traceability and biodiversity of blue mussels (*Mytilus* spp.). *Evol. Appl.* 11, 298–311 (2018).

S3 - Allele frequencies on locus *mac-1*

| Species according RFLP-PCR <i>Me15-16 AciI</i> |                  | <i>M. trossulus</i> | <i>M. edulis</i>  | <i>M. galloprovincialis</i> |                 | <i>M. chilensis</i> |                    |
|------------------------------------------------|------------------|---------------------|-------------------|-----------------------------|-----------------|---------------------|--------------------|
| Allele size [bp]                               | Code<br>Location | MT-1<br>Vancouver   | ME-1<br>P. Edward | MG-1<br>Galicia             | MG-2<br>Dichato | MCh-1<br>Putemun    | MCh-2<br>Quillaipe |
| 164                                            |                  | 0.011               | -                 | -                           | -               | -                   | -                  |
| 221                                            |                  | 0.011               | -                 | -                           | -               | -                   | -                  |
| 251                                            |                  | 0.011               | -                 | -                           | -               | -                   | -                  |
| 255                                            |                  | 0.152               | 0.260             | 0.042                       | 0.020           | 0.330               | 0.408              |
| 266                                            |                  | 0.065               | 0.730             | 0.521                       | 0.050           | 0.670               | 0.582              |
| 277                                            |                  | 0.054               | -                 | -                           | -               | -                   | -                  |
| 287                                            |                  | 0.043               | -                 | -                           | -               | -                   | -                  |
| 298                                            |                  | -                   | 0.010             | 0.260                       | 0.640           | -                   | 0.010              |
| 301                                            |                  | 0.011               | -                 | -                           | -               | -                   | -                  |
| 303                                            |                  | -                   | -                 | 0.156                       | 0.070           | -                   | -                  |
| 328                                            |                  | -                   | -                 | 0.021                       | 0.220           | -                   | -                  |
| 370                                            |                  | 0.011               | -                 | -                           | -               | -                   | -                  |
| 376                                            |                  | 0.011               | -                 | -                           | -               | -                   | -                  |
| 384                                            |                  | 0.011               | -                 | -                           | -               | -                   | -                  |
| 409                                            |                  | 0.033               | -                 | -                           | -               | -                   | -                  |
| 415                                            |                  | 0.022               | -                 | -                           | -               | -                   | -                  |
| 418                                            |                  | 0.011               | -                 | -                           | -               | -                   | -                  |
| 420                                            |                  | 0.011               | -                 | -                           | -               | -                   | -                  |
| 428                                            |                  | 0.065               | -                 | -                           | -               | -                   | -                  |
| 435                                            |                  | 0.011               | -                 | -                           | -               | -                   | -                  |
| 466                                            |                  | 0.022               | -                 | -                           | -               | -                   | -                  |
| 469                                            |                  | 0.022               | -                 | -                           | -               | -                   | -                  |
| 475                                            |                  | 0.054               | -                 | -                           | -               | -                   | -                  |
| 478                                            |                  | 0.011               | -                 | -                           | -               | -                   | -                  |
| 483                                            |                  | 0.022               | -                 | -                           | -               | -                   | -                  |
| 487                                            |                  | 0.141               | -                 | -                           | -               | -                   | -                  |
| 494                                            |                  | 0.185               | -                 | -                           | -               | -                   | -                  |

S4 - Assignment performance of markers in a mono and multi-locus approach assigning individuals to species determined by RFLP-PCR *Me15-16 Aci I*

**Mono-locus approach**

**a) *mac-1***

| Species according<br>RFLP-PCR <i>Me15-16 Aci I</i> | [%]  | [Number of individuals] |                  |                             |                     | TOTAL |
|----------------------------------------------------|------|-------------------------|------------------|-----------------------------|---------------------|-------|
|                                                    |      | <i>M. trossulus</i>     | <i>M. edulis</i> | <i>M. galloprovincialis</i> | <i>M. chilensis</i> |       |
| <i>M. trossulus</i>                                | 76.1 | 35                      | 3                | 0                           | 8                   | 46    |
| <i>M. edulis</i>                                   | 62.0 | 0                       | 31               | 1                           | 18                  | 50    |
| <i>M. galloprovincialis</i>                        | 67.7 | 0                       | 19               | 44                          | 2                   | 65    |
| <i>M. chilensis</i>                                | 37.0 | 0                       | 57               | 1                           | 34                  | 92    |
| GLOBAL                                             | 56.9 | 35                      | 110              | 46                          | 62                  | 253   |

**b) *ITS***

| Species according<br>RFLP-PCR <i>Me15-16 Aci I</i> | [%]   | [Number of individuals] |                  |                             |                     | TOTAL |
|----------------------------------------------------|-------|-------------------------|------------------|-----------------------------|---------------------|-------|
|                                                    |       | <i>M. trossulus</i>     | <i>M. edulis</i> | <i>M. galloprovincialis</i> | <i>M. chilensis</i> |       |
| <i>M. trossulus</i>                                | 100.0 | 50                      |                  | 0                           |                     | 50    |
| <i>M. edulis</i>                                   |       |                         |                  |                             |                     |       |
| <i>M. galloprovincialis</i>                        | 100.0 | 0                       |                  | 208                         |                     | 208   |
| <i>M. chilensis</i>                                |       |                         |                  |                             |                     |       |
| GLOBAL                                             | 100.0 | 50                      |                  | 208                         |                     | 258   |

**c) *COI***

| Species according<br>RFLP-PCR <i>Me15-16 Aci I</i> | [%]   | [Number of individuals] |                  |                             |                     | TOTAL |
|----------------------------------------------------|-------|-------------------------|------------------|-----------------------------|---------------------|-------|
|                                                    |       | <i>M. trossulus</i>     | <i>M. edulis</i> | <i>M. galloprovincialis</i> | <i>M. chilensis</i> |       |
| <i>M. trossulus</i>                                |       |                         |                  |                             |                     |       |
| <i>M. edulis</i>                                   | 98.8  |                         | 164              |                             | 2                   | 166   |
| <i>M. galloprovincialis</i>                        |       |                         |                  |                             |                     |       |
| <i>M. chilensis</i>                                | 100.0 |                         | 0                |                             | 92                  | 92    |
| GLOBAL                                             |       |                         | 164              |                             | 94                  | 258   |

**d) *16S***

| Species according<br>RFLP-PCR <i>Me15-16 Aci I</i> | [%]   | [Number of individuals] |                  |                             |                     | TOTAL |
|----------------------------------------------------|-------|-------------------------|------------------|-----------------------------|---------------------|-------|
|                                                    |       | <i>M. trossulus</i>     | <i>M. edulis</i> | <i>M. galloprovincialis</i> | <i>M. chilensis</i> |       |
| <i>M. trossulus</i>                                | 100.0 | 45                      | 0                | 0                           | 0                   | 45    |
| <i>M. edulis</i>                                   | 98.0  | 0                       | 49               | 0                           | 1                   | 50    |
| <i>M. galloprovincialis</i>                        | 7.6   | 0                       | 59               | 5                           | 2                   | 66    |
| <i>M. chilensis</i>                                | 100.0 | 0                       | 0                | 0                           | 92                  | 92    |
| GLOBAL                                             |       | 45                      | 108              | 5                           | 95                  | 253   |

**Multi-locus approach**

**e) *mac-1, ITS, COI, 16S***

| Species according<br>RFLP-PCR <i>Me15-16 Aci I</i> | [%]   | [Number of individuals] |                  |                             |                     | TOTAL |
|----------------------------------------------------|-------|-------------------------|------------------|-----------------------------|---------------------|-------|
|                                                    |       | <i>M. trossulus</i>     | <i>M. edulis</i> | <i>M. galloprovincialis</i> | <i>M. chilensis</i> |       |
| <i>M. trossulus</i>                                | 100.0 | 50                      | 0                | 0                           | 0                   | 50    |
| <i>M. edulis</i>                                   | 96.0  | 0                       | 48               | 1                           | 1                   | 50    |
| <i>M. galloprovincialis</i>                        | 65.2  | 0                       | 21               | 43                          | 2                   | 66    |
| <i>M. chilensis</i>                                | 100.0 | 0                       | 0                | 0                           | 92                  | 92    |
| GLOBAL                                             |       | 50                      | 69               | 44                          | 95                  | 258   |

**f) *Me15-16, mac-1, ITS, COI, 16S***

| Species according<br>RFLP-PCR <i>Me15-16 Aci I</i> | [%]   | [Number of individuals] |                  |                             |                     | TOTAL |
|----------------------------------------------------|-------|-------------------------|------------------|-----------------------------|---------------------|-------|
|                                                    |       | <i>M. trossulus</i>     | <i>M. edulis</i> | <i>M. galloprovincialis</i> | <i>M. chilensis</i> |       |
| <i>M. trossulus</i>                                | 100.0 | 50                      | 0                | 0                           | 0                   | 50    |
| <i>M. edulis</i>                                   | 100.0 | 0                       | 50               | 0                           | 0                   | 50    |
| <i>M. galloprovincialis</i>                        | 100.0 | 0                       | 0                | 66                          | 0                   | 66    |
| <i>M. chilensis</i>                                | 100.0 | 0                       | 0                | 0                           | 92                  | 92    |
| GLOBAL                                             |       | 50                      | 50               | 66                          | 92                  | 258   |

**S5 - Concordance between RFLP-PCR *Me15-16* *AciI* and each marker measured through Sensitivity, Specificity and Positive likelihood ratio (95% Confidence interval)**

| Locus                                                                                         |     | Species                  |                          |                             |                          |
|-----------------------------------------------------------------------------------------------|-----|--------------------------|--------------------------|-----------------------------|--------------------------|
|                                                                                               |     | <i>M. trossulus</i>      | <i>M. edulis</i>         | <i>M. galloprovincialis</i> | <i>M. chilensis</i>      |
| <i>mac-1</i>                                                                                  | S   | 0.76 (0.61 - 0.87)       | 0.62 (0.47 - 0.75)       | 0.68 (0.55 - 0.79)          | 0.37 (0.27 - 0.48)       |
|                                                                                               | E   | 1.00 (0.98 - 1.00)       | 0.61 (0.54 - 0.68)       | 0.99 (0.96 - 1.00)          | 0.83 (0.76 - 0.88)       |
|                                                                                               | LR+ | 314.21 (19.63 - 5030.74) | 1.59 (1.21 - 2.10)       | 63.63 (15.87 - 255.14)      | 2.12 (1.38 - 3.27)       |
| <i>ITS HhaI</i>                                                                               | S   | 1.00 (0.93 - 1.00)       |                          | 1.00 (0.98 - 1.00)          |                          |
|                                                                                               | E   | 1.00 (0.98 - 1.00)       |                          | 1.00 (0.93 - 1.00)          |                          |
|                                                                                               | LR+ | 413.90 (25.97 - 6596.23) |                          | 102.00 (6.47 - 1608.66)     |                          |
| <i>COI XbaI</i>                                                                               | S   |                          | 0.99 (0.96 - 1.00)       |                             | 1.00 (0.96 - 1.00)       |
|                                                                                               | E   |                          | 1.00 (0.96 - 1.00)       |                             | 0.99 (0.96 - 1.00)       |
|                                                                                               | LR+ |                          | 183.22 (11.55 - 2907.57) |                             | 83.00 (20.93 - 329.10)   |
| <i>16s rRNA</i>                                                                               | S   | 1.00 (0.92 - 1.00)       | 0.98 (0.89 - 1.00)       | 0.08 (0.03 - 0.17)          | 1.00 (0.96 - 1.00)       |
|                                                                                               | E   | 1.00 (0.98 - 1.00)       | 0.71 (0.64 - 0.77)       | 1.00 (0.98 - 1.00)          | 0.98 (0.95 - 1.00)       |
|                                                                                               | LR+ | 413.46 (25.94 - 6589.34) | 3.37 (2.71 - 4.20)       | 30.87 (1.73 - 550.73)       | 53.67 (17.49 - 164.64)   |
| 4 markers: <i>mac-1</i> , <i>ITS</i><br><i>COI XbaI</i> , <i>16s rRNA</i>                     | S   | 1.00 (0.93 - 1.00)       | 0.96 (0.86 - 1.00)       | 0.65 (0.52 - 0.76)          | 1.00 (0.96 - 1.00)       |
|                                                                                               | E   | 1.00 (0.98 - 1.00)       | 0.90 (0.85 - 0.94)       | 0.99 (0.97 - 1.00)          | 0.98 (0.95 - 1.00)       |
|                                                                                               | LR+ | 413.90 (25.97 - 6596.23) | 9.51 (6.31 - 14.32)      | 125.09 (17.57 - 890.55)     | 55.33 (18.03 - 169.81)   |
| All markers: <i>Me 15-16</i> , <i>mac-1</i> , <i>ITS</i><br><i>COI XbaI</i> , <i>16s rRNA</i> | S   | 1.00 (0.93 - 1.00)       | 1.00 (0.93 - 1.00)       | 1.00 (0.95 - 1.00)          | 1.00 (0.96 - 1.00)       |
|                                                                                               | E   | 1.00 (0.98 - 1.00)       | 1.00 (0.98 - 1.00)       | 1.00 (0.98 - 1.00)          | 1.00 (0.98 - 1.00)       |
|                                                                                               | LR+ | 413.86 (25.97 - 6595.60) | 413.90 (25.97 - 6596.23) | 383.12 (24.04 - 6103.63)    | 326.24 (20.49 - 5193.91) |

S: Sensitivity    E: Specificity    LR+: Positive likelihood ratio

**S6 - Haplotype frequencies on locus 16S**

| Haplotype                         | Species according RFLP-PCR <i>Me15-16 AciI</i> |           | <i>M. trossulus</i> |         | <i>M. edulis</i> |         | <i>M. galloprovincialis</i> |  | <i>M. chilensis</i> |  |
|-----------------------------------|------------------------------------------------|-----------|---------------------|---------|------------------|---------|-----------------------------|--|---------------------|--|
|                                   | Code:                                          | MT-1      | ME-1                | MG-1    | MG-2             | MCh-1   | MCh-2                       |  |                     |  |
|                                   | Location:                                      | Vancouver | P. Edward           | Galicia | Dichato          | Putemun | Quillaipe                   |  |                     |  |
| <i>M. trossulus</i>               |                                                | 0.978     | -                   | -       | -                | -       | -                           |  |                     |  |
| <i>M. trossulus</i> *             |                                                | 0.022     | -                   | -       | -                | -       | -                           |  |                     |  |
| <i>M. edulis</i>                  |                                                | -         | 0.980               | 0.957   | 0.750            | -       | -                           |  |                     |  |
| <i>M. galloprovincialis</i> (NHG) |                                                | -         | -                   | 0.043   | -                | -       | -                           |  |                     |  |
| <i>M. galloprovincialis</i> *     |                                                | -         | -                   | -       | 0.150            | -       | -                           |  |                     |  |
| <i>M. chilensis</i> (SHG)         |                                                | -         | 0.020               | -       | 0.100            | 1.000   | 1.000                       |  |                     |  |

\* New haplotype
